# Supplementary material for: COVID-19 Vaccination Intent, Barriers and Facilitators in Healthcare Workers: Insights from a Cross-Sectional Study on 2500 Employees at LMU University Hospital in Munich, Germany
Source: MDPI journal article supplement (doi:10.3390/vaccines10081231), 2022-07-31
Supplement: s1 [file s1]

---

*Article*

The following tables provide further insights into the data collected through the implemented questionnaire. The data refers to the utilization of information sources within the LMU University hospital.

**Table S1.** Engagement with internal communication channels and platforms at LMU University Hospital

| How often do you use the following information sources at LMU University Hospital?                                                                            | Never    |      | Rarely          |      | Occasionally |      | Often        |      | Always |      | Does not apply to me |     |
|---------------------------------------------------------------------------------------------------------------------------------------------------------------|----------|------|-----------------|------|--------------|------|--------------|------|--------|------|----------------------|-----|
|                                                                                                                                                               | N        | %    | N               | %    | N            | %    | N            | %    | N      | %    | N                    | %   |
| Intranet (incl. Magazine “wir!online”)                                                                                                                        | 131      | 5.1  | 330             | 12.9 | 623          | 24.4 | 870          | 34.1 | 574    | 22.5 | 27                   | 1.1 |
| IT-Portal (for use outside of the campus)                                                                                                                     | 462      | 18.1 | 511             | 20.0 | 618          | 24.2 | 589          | 23.1 | 327    | 12.8 | 48                   | 1.9 |
| COVID-19 newsletter                                                                                                                                           | 58       | 2.3  | 131             | 5.1  | 292          | 11.4 | 746          | 29.2 | 1299   | 50.8 | 29                   | 1.1 |
| Print media (magazine “Klinikum aktuell”, posters, flyers)                                                                                                    | 642      | 25.1 | 837             | 32.8 | 606          | 23.7 | 311          | 12.2 | 117    | 4.6  | 42                   | 1.6 |
| Information from my manager                                                                                                                                   | 243      | 9.5  | 447             | 17.5 | 480          | 18.8 | 585          | 22.9 | 682    | 26.7 | 118                  | 4.6 |
| The hospital’s social media channels                                                                                                                          | 1767     | 69.2 | 383             | 15.0 | 187          | 7.3  | 90           | 3.5  | 36     | 1.4  | 92                   | 3.6 |
| Information events for all of the hospital’s employees                                                                                                        | 845      | 33.1 | 620             | 24.3 | 508          | 19.9 | 309          | 12.1 | 190    | 7.4  | 83                   | 3.2 |
| Information events at my own department/clinic                                                                                                                | 521      | 20.4 | 432             | 16.9 | 411          | 16.1 | 492          | 19.3 | 453    | 17.7 | 246                  | 9.6 |
| Other mailings with employee information                                                                                                                      | 92       | 3.6  | 182             | 7.1  | 357          | 14.0 | 690          | 27.0 | 1177   | 46.1 | 57                   | 2.2 |
| Scientific sources of the hospital/university                                                                                                                 | 302      | 11.8 | 466             | 18.2 | 685          | 26.8 | 721          | 28.2 | 309    | 12.1 | 72                   | 2.8 |
| Direct contact with the vaccination center                                                                                                                    | 1782     | 69.7 | 401             | 15.7 | 115          | 4.5  | 45           | 1.8  | 33     | 1.3  | 179                  | 7.0 |
| <b>Think about the information about the vaccination / vaccination center at the LMU Klinikum: To what extent do you agree with the following statements?</b> |          |      |                 |      |              |      |              |      |        |      |                      |     |
|                                                                                                                                                               | Disagree |      | Rather disagree |      | Partly       |      | Rather agree |      | Agree  |      |                      |     |
|                                                                                                                                                               | N        | %    | N               | %    | N            | %    | N            | %    | N      | %    | N                    | %   |
| In general, the LMU University Hospital has provided sufficient information regarding the in-house vaccination campaign.                                      | 146      | 5.7  | 273             | 10.7 | 671          | 26.3 | 873          | 34.2 | 592    | 23.2 |                      |     |

|                                                                                                                        |      |      |     |      |     |      |      |      |      |      |
|------------------------------------------------------------------------------------------------------------------------|------|------|-----|------|-----|------|------|------|------|------|
| The LMU University Hospital has provided sufficient information regarding the in-house vaccination process.            | 167  | 6.5  | 320 | 12.5 | 593 | 23.2 | 794  | 31.1 | 681  | 26.7 |
| The LMU University Hospital has provided sufficient information regarding the utilized COVID-19 vaccines.              | 244  | 9.5  | 501 | 19.6 | 643 | 25.2 | 671  | 26.3 | 496  | 19.4 |
| I generally felt well informed about the vaccination campaign at LMU University Hospital.                              | 180  | 7.0  | 360 | 14.1 | 607 | 23.8 | 812  | 31.8 | 596  | 23.3 |
| The information of the LMU University Hospital regarding the vaccination campaign are factual, objective and reliable. | 85   | 3.3  | 140 | 5.5  | 422 | 16.5 | 1051 | 41.1 | 857  | 33.5 |
| The information of the LMU University Hospital regarding the vaccination campaign easily understandable.               | 80   | 3.1  | 103 | 4.0  | 335 | 13.1 | 977  | 38.2 | 1060 | 41.5 |
| The information of the LMU University Hospital regarding the vaccination campaign is up to date.                       | 89   | 3.5  | 141 | 5.5  | 514 | 20.1 | 1018 | 39.8 | 793  | 31.0 |
| It is important for me that information materials of LMU University Hospital quote relevant experts.                   | 168  | 6.6  | 389 | 15.2 | 607 | 23.8 | 737  | 28.8 | 654  | 25.6 |
| It is important for me to have a direct contact person to discuss my questions with.                                   | 186  | 7.3  | 347 | 13.6 | 454 | 17.8 | 765  | 29.9 | 803  | 31.4 |
| I would have appreciated information from the LMU University Hospital in a different language besides German.*         | 1973 | 77.2 | 234 | 9.2  | 125 | 4.9  | 96   | 3.8  | 127  | 5.0  |

\*Participants had the opportunity to suggest further languages in which the information should be provided. The following list represents the suggestions with five or more mentions (multiple suggestions were possible): All languages spoken by the hospital's employees n=245 (57.6%), English n=39 (9.2%), Polish n=31 (7.3%), Other languages (e.g. Bulgarian, Romanian, Chinese) n= 29 (6.8%), Russian n=19 (4.5%), Arabic n=14 (3.3%), Spanish n=14 (3.3%), French n=11 (2.6%), Serbo-Croatian n=8 (1.9%), Italian n=8 (1.9%), Turkish n=7 (1.6%)

**Table S2.** Utilization of the internal communication platforms at LMU University Hospital

| <b>Which information/communication sources are you missing?</b>                                       | <b>N</b> | <b>%</b> |
|-------------------------------------------------------------------------------------------------------|----------|----------|
| A mobile application for employees                                                                    | 429      | 16.8     |
| A comment function on the intranet page posts of the hospital                                         | 365      | 14.3     |
| A hotline for questions regarding the COVID-19 vaccination                                            | 653      | 25.6     |
| A group chat in a messenger app (e.g. WhatsApp)                                                       | 184      | 7.2      |
| No further sources or channels needed                                                                 | 1436     | 56.2     |
| <b>Did you participate in the information event on the topic of vaccines organized on 15.12.2020?</b> | <b>N</b> | <b>%</b> |
| Yes                                                                                                   | 404      | 15.8     |
| No                                                                                                    | 1273     | 49.8     |
| I did not participate in the event, but I watched the video recording afterwards                      | 469      | 18.4     |
| I am not interested in such events                                                                    | 84       | 3.3      |
| I do not remember                                                                                     | 163      | 6.4      |
| No answer                                                                                             | 162      | 6.3      |
