# Supplementary material for: COVID-19 Vaccination Intent, Barriers and Facilitators in Healthcare Workers: Insights from a Cross-Sectional Study on 2500 Employees at LMU University Hospital in Munich, Germany
Source: MDPI journal article supplement (doi:10.3390/vaccines10081231), 2022-07-31
Supplement: s1 [file s1]

## Article

The following tables present the tested models that were not chosen for interpretation due to their poor model fit compared to the other model(s) chosen for interpretation.

**Table S3 (adjusted).** Multinomial logistic regression of attitudes towards vaccinations associated with intent to receive a COVID-19 vaccine

| <b>"I think it's important that everyone receives the recommended vaccinations."</b><br><b>**</b> | Vaccination intent |                |                    |                    |                     |
|---------------------------------------------------------------------------------------------------|--------------------|----------------|--------------------|--------------------|---------------------|
|                                                                                                   | Yes (ref.)         | No             |                    | Maybe              |                     |
|                                                                                                   | N                  | N<br>RR        | 95% CI             | N<br>(RR)          | 95% CI              |
| Disagree / rather disagree                                                                        | 13                 | 65<br>649.302. | 256.600 – 1642.999 | 32<br>56.369.      | 26.898 –<br>118.129 |
| Partly                                                                                            | 32                 | 7<br>25.922.   | 9.026 - 74.451     | 50<br>33.607.      | 19.405 –<br>58.206  |
| <b>„When you hear a negative comment about vaccine(s), do you:....."</b><br><b>**</b>             |                    |                |                    |                    |                     |
| “Ask for the opinion(s) of those in your in your private environment” - no                        | 862                | 60<br>.736.    | .412 - 1.1312      | 89<br>.203.        | .327 -<br>.7775     |
| “Get the opinion of a doctor or healthcare professional” - no                                     | 799                | 65<br>1.890.   | 1.017 - 3.513      | 100<br>1.394.      | .889 –<br>2.186     |
| “Check the correctness of the statements through media reports” – no                              | 328                | 30<br>1.579.   | .804 - 3.100       | 43<br>.965.        | .580 -<br>1.604     |
| “I do not (often) deal with negative comments” – no                                               | 865                | 73<br>2,633    | 1.121 - 6.182      | 111<br>1,141       | .652 -<br>1.996     |
| “No answer” - no                                                                                  | 1038               | 69<br>.632     | .247 - 1.613       | 120<br>.508        | .229 -<br>1.127     |
| „I engage with the person expressing the negative comment” – no***                                | 1097               | 82             |                    | 1134               |                     |
| <b>“Did you get vaccinated against influenza in 2020/21 season?”****</b>                          |                    |                |                    |                    |                     |
|                                                                                                   | Yes (ref.)         | No             |                    | Maybe              |                     |
|                                                                                                   | N                  | N<br>RR        | 95% CI             | N<br>(RR; p-value) | 95% CI              |
| “Yes”                                                                                             | 665                | 13<br>.125     | .067 - .232        | 29<br>.186         | .120<br>-.287       |
| “No” (ref.)                                                                                       | 439                | 69             |                    | 105                |                     |
| All (not yet vaccinated)                                                                          | 1104               | 82             |                    | 134                |                     |

\*AIC =398.414 BIC = 564.346, adjusted for age, education; Reference category. Agree / rather agree;

\*\*Multiple choice question, AIC = 853.136 BIC = 1050,180, adjusted for age, education; Reference category in each item is the answer „yes” to executing the given action; \*\*\*Too few cases to allow for analysis; \*\*\*\*AIC = 410.415 BIC = 565.977, adjusted for age;

**Table S4 (unadjusted).** Binomial logistic regression of attitudes towards vaccinations associated with negative COVID-19 vaccination status

| "To what extent do you agree with the following statement? "               |      | Vaccination status (not vaccinated) |               |
|----------------------------------------------------------------------------|------|-------------------------------------|---------------|
| "I find it important for everyone to receive the recommended vaccinations" | N    | OR                                  | 95% CI        |
| Disagree / rather disagree                                                 | 110  | .158                                | .095 – .261   |
| Partly                                                                     | 89   | .574                                | .404 – .814   |
| „When you hear a negative comment about vaccine(s), do you:.....“**        |      |                                     |               |
|                                                                            | N    | OR                                  | 95% CI        |
| “Ask for the opinion(s) of those in your private environment” – no         | 1011 | 1.139                               | .937 – 1.385  |
| “Get the opinion of a doctor or healthcare professional” – no              | 964  | .935                                | .778 – 1.124  |
| “Check the correctness of the statements through media reports” – no       | 401  | 1.049                               | .851 – 1.293  |
| “I do not (often) deal with negative comments” – no                        | 1049 | .916                                | .732 – 1.146  |
| “No answer” – no                                                           | 1227 | 2.012                               | 1.329 – 3.048 |
| „I engage with the person expressing the negative comment“ – no****        | 1313 | -                                   | -             |
| All                                                                        | 1320 |                                     |               |

\* Cox & Snell R-Quadrat = .031 Nagelkerkes R-Quadrat = .041; Reference category; Agree / rather agree; \*\*Multiple choice question, Cox & Snell R-Quadrat = .007 Nagelkerkes R-Quadrat = .009; Reference category in each item is the answer „yes“ to executing the given action (\*\*\*too few cases to allow for analysis)

**Table S5 (adjusted).** Binomial logistic regression of negative COVID-19 vaccination status associated with the attitudes towards other implemented nonpharmaceutical measures

| "In general regard to the COVID-19 vaccination campaign, it is important for me..."*                             |     | Vaccination status (not vaccinated) |               |
|------------------------------------------------------------------------------------------------------------------|-----|-------------------------------------|---------------|
| "...that the current measures at LMU University Hospital (e.g. mask mandate) remain valid until the end of 2021" | N   | OR                                  | 95% CI        |
| Disagree                                                                                                         | 90  | .957                                | .610 – 1.500  |
| Rather disagree                                                                                                  | 85  | .911                                | .597 – 1.390  |
| Partly agree                                                                                                     | 235 | 1.152                               | .878 – 1.511  |
| Rather agree                                                                                                     | 347 | 1.432                               | 1.147 – 1.787 |
| "...that the current measures at LMU University Hospital (e.g. mask mandate) remain valid in 2022 as well"       | N   | OR                                  | 95% CI        |
| Disagree                                                                                                         | 210 | .711                                | .496 – 1.019  |
| Rather disagree                                                                                                  | 216 | .660                                | .481 – .905   |
| Partly agree                                                                                                     | 439 | .723                                | .560 – .933   |
| Rather agree                                                                                                     | 228 | .756                                | .577 – .992   |

| <b>"...that testing at the LMU University Hospital should remain broadly available regardless of the vaccination campaign"</b> | <b>N</b> | <b>OR</b> | <b>95% CI</b> |
|--------------------------------------------------------------------------------------------------------------------------------|----------|-----------|---------------|
| Disagree                                                                                                                       | 34       | .330      | .157 - .693   |
| Rather disagree                                                                                                                | 23       | .646      | .326 - 1.282  |
| Partly agree                                                                                                                   | 76       | .753      | .521 - 1.089  |
| Rather agree                                                                                                                   | 361      | .792      | .652 - .962   |
| All                                                                                                                            | 1320     |           |               |

\*Cox & Snell R-Quadrat = .016 Nagelkerkes R-Quadrat = .021; the distribution of answers allowed for testing without merging any categories; Reference category in each item is the answer „Agree“;

**Table S6 (adjusted).** Multinomial logistic regression models with the Health Belief Model factors associated with intent to receive a COVID-19 vaccine

| <b>Perceived susceptibility is a predictor for getting a COVID-19 vaccine*</b>                                                                                                    |     | <b>Vaccination intent</b> |                    |                         |                         |
|-----------------------------------------------------------------------------------------------------------------------------------------------------------------------------------|-----|---------------------------|--------------------|-------------------------|-------------------------|
| $\alpha = 0,509$ AIC = 992,897 BIC = 1241,795                                                                                                                                     |     | <b>Yes (ref.)</b>         | <b>No</b>          | <b>Maybe</b>            |                         |
|                                                                                                                                                                                   |     | <b>N</b>                  | <b>N RR 95% CI</b> | <b>N RR 95% CI</b>      |                         |
| <b>"How do you rate the following aspects from your personal point of view?"</b>                                                                                                  |     |                           |                    |                         |                         |
| <b>"In regard to the spread of COVID-19 the likelihood that I myself be will infected is..."</b>                                                                                  |     |                           |                    |                         |                         |
| Very low / Low                                                                                                                                                                    | 337 | 51<br>.806.               | .292 - 2.228       | 58<br>1..735.           | .767 -<br>3.925<br>.497 |
| Medium                                                                                                                                                                            | 571 | 21<br>..505.              | .186 - 1.365       | 62<br>1.045.            | 2.1<br>99               |
| <b>"Since the vaccination campaign started, I've been more afraid of getting infected in my private environment than before or I've been more afraid for my loved ones."</b>      |     | <b>N</b>                  | <b>N RR 95% CI</b> | <b>N RR 95% CI</b>      |                         |
| Disagree / Rather disagree                                                                                                                                                        | 892 | 76<br>.839.               | .274 - 2.574       | 106<br>.717.            | .320 -<br>1.604<br>.321 |
| Partly                                                                                                                                                                            | 152 | 2<br>.426.                | .066 - 2.744       | 20<br>.831.             | 2.1<br>48               |
| <b>"Since the vaccination campaign started, I've been less afraid of getting infected in my private environment than before or I've been less more afraid for my loved ones."</b> |     | <b>N</b>                  | <b>N RR 95% CI</b> | <b>N RR 95% CI</b>      |                         |
| Disagree / Rather disagree                                                                                                                                                        | 571 | 70<br>2.050.              | .894 - 5.196       | 90<br>(1.895;<br>0.083) | .920 -<br>3.906         |
| Partly                                                                                                                                                                            | 255 | 2<br>.263.                | .050 - 1.398       | 31<br>1.655.            | .758 -<br>3.615         |
| <b>"Since the vaccination campaign started, I've been less afraid of getting infected in my professional environment than before."</b>                                            |     | <b>N</b>                  | <b>N RR 95% CI</b> | <b>N RR 95% CI</b>      |                         |
| Disagree / Rather disagree                                                                                                                                                        | 575 | 71<br>2.628.              | .940 - 7.346       | 93<br>2.996.            | 1.387 -<br>6.472        |
| Partly                                                                                                                                                                            | 248 | 3<br>.480.                | .109 - 2.108       | 30<br>2.294.            | 1.029 -<br>5.114        |

|                                                                                                                                        |     |            |               |         |             |         |        |
|----------------------------------------------------------------------------------------------------------------------------------------|-----|------------|---------------|---------|-------------|---------|--------|
| <b>"Since the vaccination campaign started, I've been more afraid of getting infected in my professional environment than before."</b> |     | N          | N             | 95% CI  | N           | p-      | 95% CI |
|                                                                                                                                        |     |            | RR            |         | (RR; value) |         |        |
| Disagree / Rather disagree                                                                                                             | 925 | 78         | 2.239         | -       | 109         | .899    | -      |
|                                                                                                                                        |     | 7.286.     | 23.718        |         | 2.234.      | 5.554   |        |
| Partly                                                                                                                                 | 124 | 2          | .458 - 4.764  |         | 18          | .889    | -      |
|                                                                                                                                        |     | 1.478.     | 2.057.        |         | 4.759       |         |        |
| <b>Perceived severity is a predictor for a getting a COVID-19 vaccine</b>                                                              |     | Yes (ref.) | No            |         | Maybe       |         |        |
| $\alpha = 0,817$ AIC = 631,736 BIC = 818,409                                                                                           |     |            |               |         |             |         |        |
| <b>"How do you rate the following aspects from your personal point of view?"</b>                                                       |     | N          | N             | 95% CI  | N           |         | 95% CI |
|                                                                                                                                        |     |            | RR            |         | RR          |         |        |
| <b>"In regard to the spread of COVID-19 the probability of me getting sick from COVID-19 is..."</b>                                    |     |            |               |         |             |         |        |
| Very low / Low                                                                                                                         | 370 | 60         | .859 - 6.492  |         | 59          | 1.018   | -      |
|                                                                                                                                        |     | 2.361.     | 2.323.        |         | 5.301       |         |        |
| Medium                                                                                                                                 | 562 | 16         | .206 - 1.621  |         | 65          | .831    | -      |
|                                                                                                                                        |     | 0.577.     | 1.798.        |         | 3.891       |         |        |
| <b>"In regard to the spread of COVID-19 the probability of me getting seriously ill from COVID-19 is..."</b>                           |     | N          | N             | 95% CI  | N           |         | 95% CI |
|                                                                                                                                        |     |            | RR            |         | RR          |         |        |
| Very low / Low                                                                                                                         | 654 | 72         | .845 - 61.482 |         | 91          | .610    | -      |
|                                                                                                                                        |     | 7.206.     | 1.652 .       |         | 4.472       | .507    |        |
| Medium                                                                                                                                 | 342 | 9          | .366 - 27.898 |         | 37          |         | 3.6    |
|                                                                                                                                        |     | 3.197.     | 1.357.        |         | 30          |         |        |
| <b>Perceived benefits are a predictor for a getting a COVID-19 vaccine</b>                                                             |     | Yes (ref.) | No            |         | Maybe       |         |        |
| $\alpha = 445,166$ BIC = 611,098                                                                                                       |     |            |               |         |             |         |        |
| <b>"I am completely convinced of the effectiveness of the COVID-19 vaccines"</b>                                                       |     | N          | N             | 95% CI  | N           |         | 95% CI |
|                                                                                                                                        |     |            | RR            |         | RR          |         |        |
| Disagree / Rather disagree                                                                                                             | 17  | 63         | 290.349 -     | 46      | 48.215      |         |        |
|                                                                                                                                        |     | 799.199.   | 2199.823      | 98.278. | -           | 200.322 |        |
| Partly                                                                                                                                 | 170 | 12         | 4.391 -       | 54      | 5.758       | 15.     |        |
|                                                                                                                                        |     | 11.704.    | 31.202        | 9.342.  | 157         |         |        |
| <b>Perceived barriers are a predictor for a getting a COVID-19 vaccine</b>                                                             |     | Yes (ref.) | No            |         | Maybe       |         |        |
| $\alpha = 0,845$ AIC = 561,019 BIC = 747,693                                                                                           |     |            |               |         |             |         |        |
| <b>"I am completely convinced of the safety of the COVID-19 vaccines"</b>                                                              |     | N          | N             | 95% CI  | N           |         | 95% CI |
|                                                                                                                                        |     |            | RR            |         | RR          |         |        |
| Disagree / Rather disagree                                                                                                             | 33  | 71         | 40.369 -      | 59      | 10.456      |         |        |
|                                                                                                                                        |     | 169..818.  | 714.364       | 23.034. | -           | 50.745  |        |
| Partly                                                                                                                                 | 215 | 8          | 1.432 -       | 57      | 3.111       | -       |        |
|                                                                                                                                        |     | 6.428      | 28.859        | 6.038   | 11.717      |         |        |
| <b>"I have no concerns regarding the COVID-19 vaccines"</b>                                                                            |     | N          | N             | 95% CI  | N           |         | 95% CI |
|                                                                                                                                        |     |            | RR            |         | RR          |         |        |

|                            |      |             |                 |               |                 |   |
|----------------------------|------|-------------|-----------------|---------------|-----------------|---|
| Disagree / Rather disagree | 93   | 73<br>9.772 | 2.747<br>34.766 | - 81<br>7.721 | 3.794<br>15.712 | - |
| Partly                     | 215  | 5<br>1.696  | .370 - 7.772    | 36<br>2.782   | 1.366<br>5.655  | - |
| All                        | 1104 | 82          |                 |               | 134             |   |

\* Reference category in each item is the highest answer on the merged Likert scale („Rather agree / Agree“ or „High / Very high“)

**Table S7 (unadjusted).** Binomial logistic regression models with the Health Belief Model factors associated with intent to receive a COVID-19 vaccine

| Perceived susceptibility is a predictor for getting a COVID-19 vaccine*o                                                                                                     |      | Vaccination status (not vaccinated) |               |        |
|------------------------------------------------------------------------------------------------------------------------------------------------------------------------------|------|-------------------------------------|---------------|--------|
|                                                                                                                                                                              |      | N                                   | OR            | 95% CI |
| <b>“How do you rate the following aspects from your personal point of view?”</b>                                                                                             |      |                                     |               |        |
| <b>“In regard to the spread of COVID-19 the likelihood that I myself be will infected is...”</b>                                                                             |      |                                     |               |        |
| Very low / Low                                                                                                                                                               | 446  | .484                                | .337 - .696   |        |
| Medium                                                                                                                                                                       | 654  | .708                                | .520 - .963   |        |
| <b>“Since the vaccination campaign started, I've been more afraid of getting infected in my private environment than before or I've been more afraid for my loved ones.”</b> |      |                                     |               |        |
| Disagree / Rather disagree                                                                                                                                                   | 1074 | 1.365                               | .880 - 2.116  |        |
| Partly                                                                                                                                                                       | 174  | .915                                | .543 - 1.540  |        |
| <b>“Since the vaccination campaign started, I've been less afraid of getting infected in my private environment than before or I've been less afraid for my loved ones.”</b> |      |                                     |               |        |
| Disagree / Rather disagree                                                                                                                                                   | 731  | .370                                | .286 - .480   |        |
| Partly                                                                                                                                                                       | 288  | .580                                | .443 - .758   |        |
| <b>“Since the vaccination campaign started, I've been less afraid of getting infected in my professional environment than before.”</b>                                       |      |                                     |               |        |
| Disagree / Rather disagree                                                                                                                                                   | 739  | .219                                | .169 - .283   |        |
| Partly                                                                                                                                                                       | 281  | .489                                | .379 - .631   |        |
| <b>“Since the vaccination campaign started, I've been more afraid of getting infected in my professional environment than before.”</b>                                       |      |                                     |               |        |
| Disagree / Rather disagree                                                                                                                                                   | 489  | 2.079                               | 1.415 - 3.053 |        |
| Partly                                                                                                                                                                       | 643  | 1.122                               | .796 - 1.582  |        |
| <b>Perceived severity is a predictor for a getting a COVID-19 vaccine**</b>                                                                                                  |      |                                     |               |        |
| <b>“In regard to the spread of COVID-19 the probability of me getting sick from COVID-19 is...”</b>                                                                          |      | N                                   | OR            | 95% CI |
| Very low / Low                                                                                                                                                               | 489  | 1.158                               | .856 - 1.565  |        |
| Medium                                                                                                                                                                       | 643  | 0.823                               | .624 - 1.087  |        |
| <b>“In regard to the spread of COVID-19 the probability of me getting seriously ill from COVID-19 is...”</b>                                                                 |      |                                     |               |        |
| Very low / Low                                                                                                                                                               | 817  | 1.388                               | .973 - 1.980  |        |

|                                                                                  |      |       |              |
|----------------------------------------------------------------------------------|------|-------|--------------|
| Medium                                                                           | 388  | 0.954 | .668 - 1.364 |
| <b>Perceived benefits are a predictor for a getting a COVID-19 vaccine***</b>    |      |       |              |
| <b>“I am completely convinced of the effectiveness of the COVID-19 vaccines”</b> | N    | OR    | 95% CI       |
| Disagree / Rather disagree                                                       | 126  | .078  | .042 - .145  |
| Partly                                                                           | 236  | .558  | .447 - .698  |
| <b>“I am completely convinced of the effectiveness of the COVID-19 vaccines”</b> | N    | OR    | 95% CI       |
| Disagree / Rather disagree                                                       | 126  | .078  | .042 - .145  |
| Partly                                                                           | 236  | .558  | .447 - .698  |
| <b>Perceived barriers are a predictor for a getting a COVID-19 vaccine****</b>   |      |       |              |
| <b>“I am completely convinced of the safety of the COVID-19 vaccines”</b>        | N    | OR    | 95% CI       |
| Disagree / Rather disagree                                                       | 163  | .216  | .129 - .361  |
| Partly                                                                           | 280  | .701  | .547 - .899  |
| <b>“I have no concerns regarding the COVID-vaccines”</b>                         |      |       |              |
| Disagree / Rather disagree                                                       | 247  | .439  | .332 - .661  |
| Partly                                                                           | 256  | .740  | .577 - .948  |
| All                                                                              | 1320 |       |              |

° Reference category in each item is the highest answer on the merged Likert scale („Rather agree / Agree“ or „High / Very high“)

\* Cox & Snell R-Quadrat = .218 Nagelkerkes R-Quadrat = .290\*\*Cox & Snell R-Quadrat= .019 Nagelkerkes R-Quadrat=.025 \*\*\* Cox & Snell R-Quadrat=.052 Nagelkerkes R-Quadrat = .070 \*\*\*\* Cox & Snell R-Quadrat= .065 Nagelkerkes R-Quadrat = .086

**Table S8 (adjusted).** Multinomial logistic regression models for the perceived knowledgeability associated with intent to receive a COVID-19 vaccine

| Perceived knowledgeability is a predictor of intent to receive a COVID-19 vaccine* | Yes (ref.) | No             | Maybe          |
|------------------------------------------------------------------------------------|------------|----------------|----------------|
| “I generally felt well informed about COVID-19 vaccines and their safety”          | N          | N<br>RR        | N<br>RR        |
| Disagree                                                                           | 30         | 24<br>19.961   | 22<br>19.182   |
| Rather disagree                                                                    | 111        | 18<br>4.407    | 32<br>(8.142)  |
| Partly                                                                             | 271        | 18<br>1.194    | 45<br>4.461    |
| Rather agree                                                                       | 433        | 14<br>0.948    | 26<br>1.672    |
|                                                                                    |            |                | 95% CI         |
|                                                                                    |            | 8.079 - 49.321 | 7.980 - 46.105 |
|                                                                                    |            | 1.820 - 10.668 | 3.715 - 17.845 |
|                                                                                    |            | .823 - 4.593   | 2.124 - 9.369  |
|                                                                                    |            | .389 - 2.308   | .768 - 3.639   |

All 1104 82 134

\* AIC = 663,511 BIC = 850,185; Reference category: "Agree"

**Table S9 (unadjusted).** Generalized linear models for the utilization of certain media platforms/channels associated with the perceived knowledgeability regarding COVID-19 vaccines

| Utilization of certain media platforms/channels and perceived knowledgeability*                                                                                            |      | Perceived knowledgeability |               |
|----------------------------------------------------------------------------------------------------------------------------------------------------------------------------|------|----------------------------|---------------|
| "What are the most common information platforms you turn to for information on vaccines?"                                                                                  | N    | OR                         | 95% CI        |
| Public television channels (e.g. ARD, ZDF, Bayerischer Rundfunk) – „no“                                                                                                    | 950  | 1.025                      | .875 - 1.203  |
| Private TV channels (e.g. ProSieben, RTL) - „no“                                                                                                                           | 2355 | 1.302                      | .987 - 1.718  |
| Daily newspapers (print or online) - „no“                                                                                                                                  | 1418 | .844                       | .726 - .982   |
| Online media (e.g. other websites) - „no“                                                                                                                                  | 1087 | 1.138                      | .975 - 1.327  |
| Radio - „no“                                                                                                                                                               | 1981 | 1.010                      | .846 - 1.207  |
| Social networks (e.g. Facebook, Twitter) - „no“                                                                                                                            | 2312 | 1.174                      | .916 - 1.505  |
| Podcasts - „no“                                                                                                                                                            | 2267 | .959                       | .762 - 1.206  |
| Personal conversations with other people - „no“                                                                                                                            | 1363 | 1.174                      | 1.000 - 1.378 |
| I do not seek specific information about vaccinations - „no“                                                                                                               | 2356 | 1.303                      | .969 - 1.752  |
| Utilization of certain media platforms/channels and COVID-19 vaccination intent**                                                                                          |      |                            |               |
| "What are the most common information channels you turn to for information on vaccines?"**                                                                                 | N    | OR                         | 95% CI        |
| Scientific sources, e.g. peer-reviewed articles, reports of clinical trials – „no“                                                                                         | 1306 | .903                       | .774 - 1.054  |
| Information from state or federal authorities (e.g. Federal Center for Health Education, Paul Ehrlich Institute or Robert Koch Institute) – „no“                           | 826  | .769                       | .648 - .912   |
| Information from international organizations, e.g. World Health Organization – „no“                                                                                        | 1846 | 1.149                      | .970 - 1.360  |
| Personal conversation with the (vaccinating) doctor or a medical professional (incl. the vaccinating healthcare professionals at the hospital's vaccination center) – „no“ | 2464 | 0.879                      | .740 - 1.026  |
| Information from health insurance companies – „no“                                                                                                                         | 2282 | 0.967                      | .650 - 1.439  |
| Information from the local health department – „no“                                                                                                                        | 2282 | 0.949                      | .749 - 1.203  |
| Information from pharmaceutical companies – „no“                                                                                                                           | 2374 | 0.868                      | .652 - 1.156  |
| Information events, e.g. meetings with experts – „no“                                                                                                                      | 2237 | 0.908                      | .730 - 1.131  |
| Personal conversations with family members, friends or acquaintances, colleagues – „no“                                                                                    | 1663 | 1.324                      | 1.124 - 1.560 |
| I do not seek specific information channels to inform myself about vaccinations – „no“                                                                                     | 2417 | 1.641                      | 1.144 - 2.355 |
| All                                                                                                                                                                        | 2555 |                            |               |

\*Pearson Chi = 0,961 (GLM); Multiple choice questions; Reference category in each item is the answer „yes“ to utilizing the given channel or platform

**Table S10 (adjusted).** Multinomial logistic regression models for the utilization of certain media platforms/channels associated with the intent to receive a COVID-19 vaccine

| Utilisation of certain media platforms/channels correlates with the intent to receive a COVID-19 vaccine *                                                                    | Yes (ref.) | No          |               | Maybe        |               |
|-------------------------------------------------------------------------------------------------------------------------------------------------------------------------------|------------|-------------|---------------|--------------|---------------|
|                                                                                                                                                                               |            |             |               |              |               |
| “What are the most common information platforms you turn to for information on vaccines?”                                                                                     | N          | N<br>RR     | 95% CI        | N<br>RR      | 95% CI        |
| Public television channels (e.g. ARD, ZDF, Bayerischer Rundfunk) – „no“                                                                                                       | 350        | 57<br>3.328 | 1.826 - 6.066 | 54<br>1.107  | .711 - 1.724  |
| Private TV channels (e.g. ProSieben, RTL) - „no“                                                                                                                              | 1008       | 73<br>.654  | .267 - 1.599  | 124<br>1.164 | .786 - 3.525  |
| Daily newspapers (print or online) - „no“                                                                                                                                     | 596        | 61<br>1.693 | .897 - 3.193  | 97<br>2.364  | 1.509 - 3.704 |
| Online media (e.g. other websites) - „no“                                                                                                                                     | 495        | 33<br>1.119 | .613 - 2.045  | 57<br>1.025  | .670 - 1.568  |
| Radio - „no“                                                                                                                                                                  | 830        | 71<br>1.613 | .761 - 3.416  | 104<br>1.164 | .719 - 1.885  |
| Social networks (e.g. Facebook, Twitter) - „no“                                                                                                                               | 1004       | 60<br>0.319 | .166 - .615   | 123<br>1.528 | .621 - 2.548  |
| Podcasts - „no“                                                                                                                                                               | 970        | 72<br>1.324 | .577 - 3.039  | 129<br>3.075 | 1.185 - 7.982 |
| Personal conversations with other people - „no“                                                                                                                               | 636        | 40<br>.851  | .469 - 1.546  | 54<br>0.512  | .329 - .796   |
| I do not seek specific information about vaccinations - „no“                                                                                                                  | 1027       | 64<br>.554  | .252 - 1.216  | 115<br>.816  | .411 - 1.620  |
| “What are the most common information channels you turn to for information on vaccines?”**                                                                                    | Yes (ref.) | No          |               | Maybe        |               |
|                                                                                                                                                                               |            |             |               |              |               |
|                                                                                                                                                                               | N          | N<br>RR     | 95% CI        | N<br>RR      | 95% CI        |
| Scientific sources, e.g. peer-reviewed articles, reports of clinical trials – „no“                                                                                            | 627        | 37<br>.459  | .251 - .842   | 85<br>.947   | .615 - 1.459  |
| Information from state or federal authorities (e.g. Federal Center for Health Education, Paul Ehrlich Institute or Robert Koch Institute) – „no“                              | 355        | 55<br>3.745 | 2.043 - 6.864 | 60<br>1.362  | .867 - 2.139  |
| Information from international organizations, eg. World Health Organization – „no“                                                                                            | 798        | 58<br>.470  | .249 - .886   | 97<br>.649   | .404 - 1.043  |
| Personal conversation with the (vaccinating) doctor or or a medical professional (incl. the vaccinating healthcare professionals at the hospital’s vaccination center) – „no“ | 814        | 65<br>1.129 | .674 - 2.473  | 104<br>1.450 | .899 - 2.337  |
| Information from health insurance companies – „no“                                                                                                                            | 1065       | 79<br>.966  | .224 - 4.172  | 126<br>.480  | .201 - 1.148  |
| Information from the local health department – „no“                                                                                                                           | 982        | 76<br>1.667 | .604 - 4.597  | 119<br>.896  | .482 - 1.665  |



|                                                                                         |             |            |              |              |              |
|-----------------------------------------------------------------------------------------|-------------|------------|--------------|--------------|--------------|
| Information from pharmaceutical companies – „no“                                        | 1043        | 71<br>.431 | .184 - 1.008 | 129<br>1,195 | .464 - 3.357 |
| Information events, e.g. meetings with experts – „no“                                   | 982         | 68<br>.607 | .292 - 1.262 | 123<br>1,195 | .600 - 2.379 |
| Personal conversations with family members, friends or acquaintances, colleagues – „no“ | 742         | 46<br>.589 | .330 - 1.053 | 64<br>.438   | .284 - .675  |
| I do not seek specific information channels to inform myself about vaccinations – „no“  | 1046        | 68<br>.421 | .165 - 1.071 | 116<br>.334  | .155 - .723  |
| <b>All</b>                                                                              | <b>1104</b> | <b>82</b>  |              |              | <b>134</b>   |

\* AIC = 1321.048 BIC = 1663.284; Reference category in each item is the answer „yes“ to utilizing the given channel or platform
